# Supplementary material for: First Report of Anopheles annularis s.l., An. maculatus s.s., and An. culicifacies s.l. as Malaria Vectors and a New Occurrence Record for An. pseudowillmori and An. sawadwongporni in Alipurduar District Villages, West Bengal, India
Source: MDPI journal article supplement (doi:10.3390/microorganisms12010095), 2024-01-03
Supplement: s1 [file s1]

Supplementary materials:

**Table S1:** Block wise malaria data of Alipurduar district from 2017 to 2022

| Year | Block/ District<br>Total   | Population | ABER (%) | Total malaria<br>cases | API   |
|------|----------------------------|------------|----------|------------------------|-------|
| 2017 | Alipurduar-I               | 220230     | 25.99    | 2                      | 0.009 |
|      | Alipurduar-II              | 232544     | 44.18    | 71                     | 0.305 |
|      | Kumargram                  | 209946     | 23.417   | 242                    | 1.153 |
|      | Falakata                   | 304513     | 30.972   | 17                     | 0.056 |
|      | Kalchini                   | 295514     | 17.371   | 664                    | 2.247 |
|      | Madarihat                  | 210712     | 20.0001  | 319                    | 1.514 |
|      | District Total             | 1473459    | 33.92    | 1315                   | 0.892 |
| 2018 | Alipurduar-I               | 236392     | 29.04    | 0                      | 0.000 |
|      | Alipurduar-II              | 243714     | 58.79    | 37                     | 0.152 |
|      | Kumargram                  | 220394     | 27.1     | 47                     | 0.213 |
|      | Falakata                   | 312719     | 36.87    | 9                      | 0.029 |
|      | Kalchini                   | 297459     | 18.66    | 14                     | 0.047 |
|      | Madarihat                  | 215411     | 34.28    | 29                     | 0.135 |
|      | District Total             | 1526089    | 33.66    | 136                    | 0.089 |
| 2019 | Alipurduar-I               | 236392     | 29.47    | 3                      | 0.013 |
|      | Alipurduar-II              | 243714     | 54.88    | 14                     | 0.057 |
|      | Kumargram                  | 220394     | 40.6     | 328                    | 1.488 |
|      | Falakata                   | 312719     | 40.26    | 8                      | 0.026 |
|      | Kalchini                   | 297459     | 23.68    | 30                     | 0.101 |
|      | Madarihat                  | 215411     | 36.46    | 52                     | 0.241 |
|      | APD<br>Municipality/<br>DH | 66116      | 16.18    | 22                     | 0.333 |
|      | District Total             | 1592205    | 36.338   | 457                    | 0.287 |
| 2020 | Alipurduar-I               | 236392     | 10.91    | 2                      | 0.008 |
|      | Alipurduar-II              | 243714     | 28.39    | 4                      | 0.016 |
|      | Kumargram                  | 220394     | 25.6     | 26                     | 0.118 |
|      | Falakata                   | 312719     | 17.43    | 2                      | 0.006 |
|      | Kalchini                   | 297459     | 14.49    | 8                      | 0.027 |
|      | Madarihat                  | 215411     | 18.14    | 2                      | 0.009 |

|      |                                     |         |       |    |       |
|------|-------------------------------------|---------|-------|----|-------|
|      | <b>APD<br/>Municipality/<br/>DH</b> | 66116   | 8.4   | 0  | 0.000 |
|      | <b>District Total</b>               | 1592205 | 18.42 | 44 | 0.028 |
| 2021 | <b>Alipurduar-I</b>                 | 228003  | 18.85 | 1  | 0.004 |
|      | <b>Alipurduar-II</b>                | 249636  | 26.02 | 6  | 0.024 |
|      | <b>Kumargram</b>                    | 215917  | 24.12 | 5  | 0.023 |
|      | <b>Falakata</b>                     | 312719  | 26.39 | 2  | 0.006 |
|      | <b>Kalchini</b>                     | 297459  | 24.26 | 6  | 0.020 |
|      | <b>Madarihat</b>                    | 218512  | 25.95 | 3  | 0.014 |
|      | <b>District Total</b>               | 1522246 | 23.71 | 23 | 0.015 |
| 2022 | <b>Alipurduar-I</b>                 | 245462  | 30.39 | 6  | 0.024 |
|      | <b>Alipurduar-II</b>                | 253066  | 36.91 | 15 | 0.059 |
|      | <b>Kumargram</b>                    | 228850  | 29.68 | 12 | 0.052 |
|      | <b>Falakata</b>                     | 324718  | 34.01 | 7  | 0.022 |
|      | <b>Kalchini</b>                     | 308873  | 32.68 | 6  | 0.019 |
|      | <b>Madarihat</b>                    | 223677  | 39.41 | 3  | 0.013 |
|      | <b>District Total</b>               | 1584646 | 32.85 | 49 | 0.031 |

**ABER-** Annual Blood Examination Rate, **API**-Annual Parasite Incidence

**Table S2:** The malaria cases reported from the study area in 2018-2020 and 2022.

| Year | PHC                 | Subcentre      | Village                | Population  | Pf cases | Pv cases | Total malaria cases | API (Malaria cases per 1000 population) |
|------|---------------------|----------------|------------------------|-------------|----------|----------|---------------------|-----------------------------------------|
| 2018 | Kumargram           | West Chengmari | Paschim Chengmari      | 3398        | 0        | 0        | 0                   | 0.00                                    |
|      |                     |                | Lalchandpur            | 895         | 0        | 0        | 0                   | 0.00                                    |
|      |                     |                | Dhantali               | 940         | 0        | 1        | 1                   | 1.06                                    |
|      |                     |                | <b>Subcentre Total</b> | <b>5233</b> | <b>0</b> | <b>1</b> | <b>1</b>            | <b>0.19</b>                             |
| 2018 | Kumargram           | Turturikhanda  | Turturikhanda          | 1552        | 0        | 3        | 3                   | 1.93                                    |
|      |                     |                | Turturi TE             | 2404        | 0        | 1        | 1                   | 0.42                                    |
|      |                     |                | <b>Subcentre Total</b> | <b>3956</b> | <b>0</b> | <b>4</b> | <b>4</b>            | <b>1.01</b>                             |
| 2018 | Madhya Rangalibazna | Gopalpur T. G  | Chapra Line            | 1402        | 0        | 0        | 0                   | 0.00                                    |
|      |                     |                | Kolkata Line           | 1418        | 0        | 0        | 0                   | 0.00                                    |
|      |                     |                | Jhari Line             | 1331        | 0        | 0        | 0                   | 0.00                                    |
|      |                     |                | Godwan Line            | 1210        | 0        | 0        | 0                   | 0.00                                    |
|      |                     |                | Upper Line             | 892         | 0        | 0        | 0                   | 0.00                                    |
|      |                     |                | <b>Subcentre Total</b> | <b>6253</b> | <b>0</b> | <b>0</b> | <b>0</b>            | <b>0.00</b>                             |
| 2018 | Turturi             | Uttar Shibkata | Uttar Shibkata         | 1255        | 0        | 3        | 3                   | 2.39                                    |
|      |                     |                | Srinathpur             | 900         | 0        | 2        | 2                   | 2.22                                    |
|      |                     |                | Maddhya Shibkata       | 899         | 0        | 2        | 2                   | 2.22                                    |

|      |           |                   |                              |             |          |            |            |              |
|------|-----------|-------------------|------------------------------|-------------|----------|------------|------------|--------------|
|      |           |                   | <b>Subcentre<br/>Total</b>   | <b>3054</b> | <b>0</b> | <b>7</b>   | <b>7</b>   | <b>2.29</b>  |
| 2018 | Turturi   | Raydak TE –I      | Raydak<br>TG                 | 4634        | 0        | 2          | 2          | 0.43         |
|      |           |                   | Chipra<br>Forest<br>village  | 473         | 0        | 0          | 0          | 0.00         |
|      |           |                   | Siltong<br>Forest<br>village | 786         | 0        | 0          | 0          | 0.00         |
|      |           |                   | <b>Subcentre<br/>Total</b>   | <b>5893</b> | <b>0</b> | <b>2</b>   | <b>2</b>   | <b>0.34</b>  |
| 2019 | Kumargram | West<br>Chengmari | Paschim<br>Chengmari         | 3398        | 0        | 4          | 4          | 1.18         |
|      |           |                   | Lalchandpur                  | 895         | 0        | 1          | 1          | 1.12         |
|      |           |                   | Dhantali                     | 940         | 0        | 1          | 1          | 1.06         |
|      |           |                   | <b>Subcentre<br/>Total</b>   | <b>5233</b> | <b>0</b> | <b>6</b>   | <b>6</b>   | <b>1.15</b>  |
| 2019 | Kumargram | Turturikhanda     | Turturikhanda                | 2552        | 0        | 4          | 4          | 1.57         |
|      |           |                   | Turturi TE                   | 2404        | 0        | 0          | 0          | 0.00         |
|      |           |                   | <b>Subcentre<br/>Total</b>   | <b>4956</b> | <b>0</b> | <b>4</b>   | <b>4</b>   | <b>0.81</b>  |
| 2019 | Turturi   | Rydak<br>TE- I    | Raydak<br>TG                 | 4634        | 2        | 200        | 202        | 43.59        |
|      |           |                   | Chipra<br>Forest<br>village  | 473         | 0        | 0          | 0          | 0.00         |
|      |           |                   | Siltong<br>Forest<br>village | 786         | 0        | 0          | 0          | 0.00         |
|      |           |                   | <b>Subcentre<br/>Total</b>   | <b>5893</b> | <b>2</b> | <b>200</b> | <b>202</b> | <b>34.28</b> |
| 2019 | Kumargram | Joydebpur         | Joydebpur                    | 2620        | 0        | 5          | 5          | 1.91         |

|      |           |                   |                            |             |          |          |          |             |
|------|-----------|-------------------|----------------------------|-------------|----------|----------|----------|-------------|
|      |           |                   | Pukharigaon                | 3018        | 0        | 0        | 0        | 0.00        |
|      |           |                   | Amarpur                    | 2637        | 0        | 3        | 3        | 1.14        |
|      |           |                   | <b>Subcentre<br/>Total</b> | <b>8275</b> | <b>0</b> | <b>8</b> | <b>8</b> | <b>0.97</b> |
| 2020 | Kumargram | West<br>Chengmari | Paschim<br>Chengmari       | 3398        | 0        | 0        | 0        | 0.00        |
|      |           |                   | Lalchandpur                | 895         | 0        | 0        | 0        | 0.00        |
|      |           |                   | Dhantali                   | 940         | 0        | 0        | 0        | 0.00        |
|      |           |                   | <b>Subcentre<br/>Total</b> | <b>5233</b> | <b>0</b> | <b>0</b> | <b>0</b> | <b>0.00</b> |
| 2022 | Turturi   | Dhowlabasti       | Dhowlaj hora -I            | 1091        | NA       | NA       | NA       | NA          |
|      |           |                   | Dhowlaj hora<br>-II        | 1524        | NA       | NA       | NA       | NA          |
|      |           |                   | Uttar<br>Rampur            | 840         | NA       | NA       | NA       | NA          |
|      |           |                   | <b>Subcentre<br/>Total</b> | <b>3455</b> | <b>3</b> | <b>5</b> | <b>8</b> | <b>2.32</b> |

NA: Not available

**Table S3:** List of PCR primers used in the current studies

| PCR                                  | Forward (5'-3')                                           | Reverse (5'-3')                        | Species                            | References |
|--------------------------------------|-----------------------------------------------------------|----------------------------------------|------------------------------------|------------|
| Maculatus group multiplex PCR        | 5.8F (ATCACTCGGCTCGTGGATCG)<br>(Universal forward primer) | Mac (GACGGTCAGTCTGGTAAAGT)             | <i>An. maculatus</i>               | 11         |
|                                      |                                                           | PSEU (GCCCCCGGGTGTCAAACAG)             | <i>An. pseudowillmori</i>          |            |
|                                      |                                                           | SAW (ACGGTCCCGCATCAGGTGC)              | <i>An. sawadwongporni</i>          |            |
|                                      |                                                           | Form K (TTCATCGCTCGCCCTTACAA)          | <i>Form K</i>                      |            |
|                                      |                                                           | DRAV (GCCTACTTTGAGCGAGACCA)            | <i>An. dravidicus</i>              |            |
| Funestus group multiplex PCR         | 5.8F (ATCACTCGGCTCATGGATCG)<br>(Universal forward primer) | GGGCGCCATGTAGTTAGAGTTG                 | <i>An. minimus A</i>               | 12         |
|                                      |                                                           | GTGGCCCCGCAATGTATG                     | <i>An. varuna</i>                  |            |
|                                      |                                                           | AGGTTCACCCCGCTCTGG                     | <i>An. aconitus</i>                |            |
|                                      |                                                           | CTCCCCATAGCGCGTAAGC                    | <i>An. jeyporiensis</i>            |            |
|                                      |                                                           | GAAAGCACCTGAAACCTGCG                   | <i>An. pampanai</i>                |            |
|                                      |                                                           | GGTTGCCCACTCAATACGGGTG                 | <i>An. minimus C</i>               |            |
| <i>Annularis</i> group multiplex PCR | 5.8F (TGTGAACTGCAGGACACATG)<br>(Universal forward primer) | PHI (GCACG CCATTAT GCGACAAAC)          | <i>An. philippinensis</i>          | 13         |
|                                      |                                                           | NIV (CATGTA CCTCAGTACA TG TA)          | <i>An. nivipes</i>                 |            |
|                                      |                                                           | ANN (ACCCCTTTGCTAGCGCCCGTG)            | <i>An. annularis</i>               |            |
|                                      |                                                           | PAL (GTTAAGTGAGACGATAAAGACC)           | <i>An. pallidus</i>                |            |
| CO1 PCR                              | MBAR_F<br>(GGATTGGAATTGATTAGTTCCTT)                       | MBAR_R<br>(AAAAATTTAATTCCAGTTGGAACAGC) | Universal for all mosquito species | 14         |
| Human blood meal assay               | HUM1 (CGAGAGTTCTCTGGAAGAATT GA)                           | HUM2<br>(TGATAGCCTGGAAGTGACAAAAT)      | <i>Homo sapiens</i>                | 15         |
